# Supplementary material for: A fundamental study of lignin reactions with formaldehyde and glyoxal
Source: Royal Society of Chemistry journal article supplement (doi:10.1039/d4gc05695g), 2025-01-01
Supplement: d4gc05695g1.pdf [file d4gc05695g1.pdf]

## Supporting Information

for:

### **A Fundamental Study of Lignin Reactions with Formaldehyde and Glyoxal**

Mohsen Siahkamari<sup>a#</sup>, Debkumar Debnath<sup>b#</sup>, Tuo Wang<sup>b\*</sup>, Mojgan Nejad<sup>a, c\*</sup>

<sup>a</sup> *Department of Forestry, Michigan State University, East Lansing, MI, 48224, USA*

<sup>b</sup> *Department of Chemistry, Michigan State University, East Lansing, MI 48824, USA*

<sup>c</sup> *Department of Chemical Engineering and Material Science, Michigan State University, East Lansing, MI, 48224, USA*

<sup>#</sup> *These authors contribute equally*

\* Corresponding Authors: [nejad@msu.edu](mailto:nejad@msu.edu); [wangtuo1@msu.edu](mailto:wangtuo1@msu.edu)

**This file (8 pages) contains:**

Supporting Figures S1 – S6

Supporting Tables S1 – S2

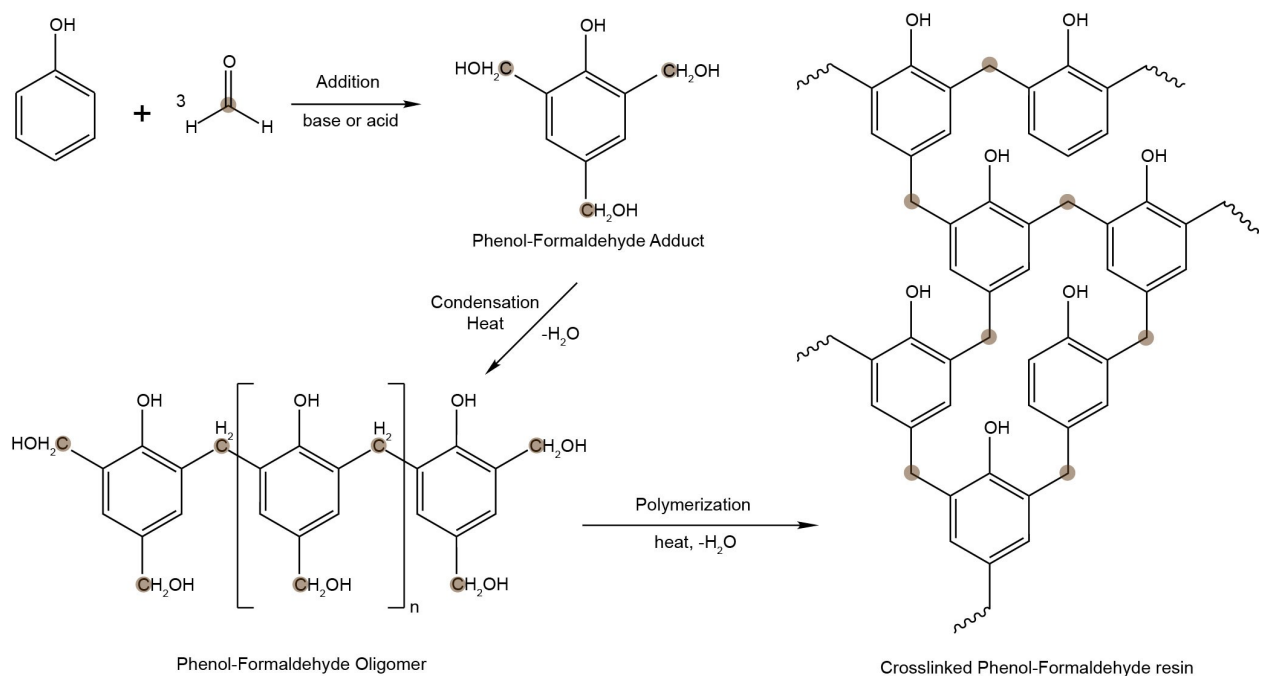

**Figure S1:** Schematic representation of the Phenol-Formaldehyde resin formation.

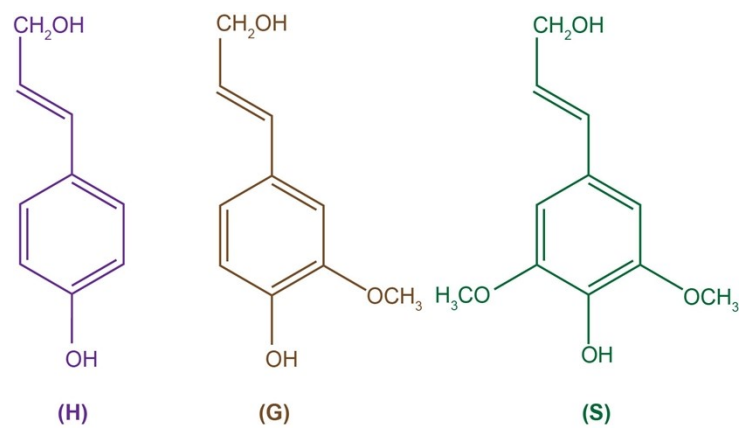

**Figure S2:** Major phenylpropanoid units of lignin.

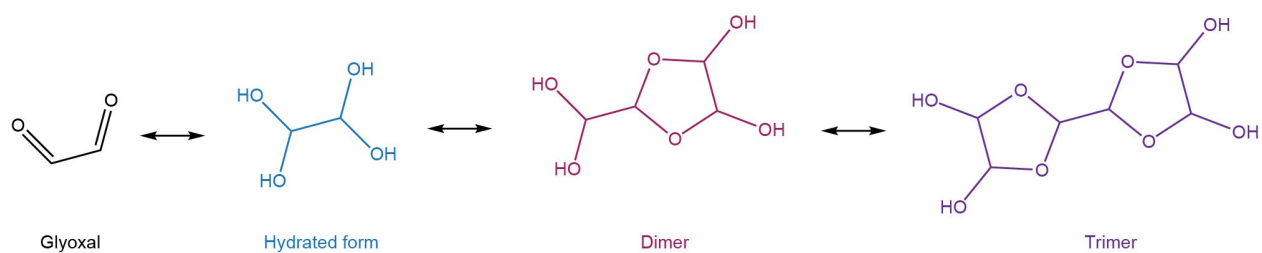

**Figure S3:** Structure of glyoxal and major hydrated oligomers.

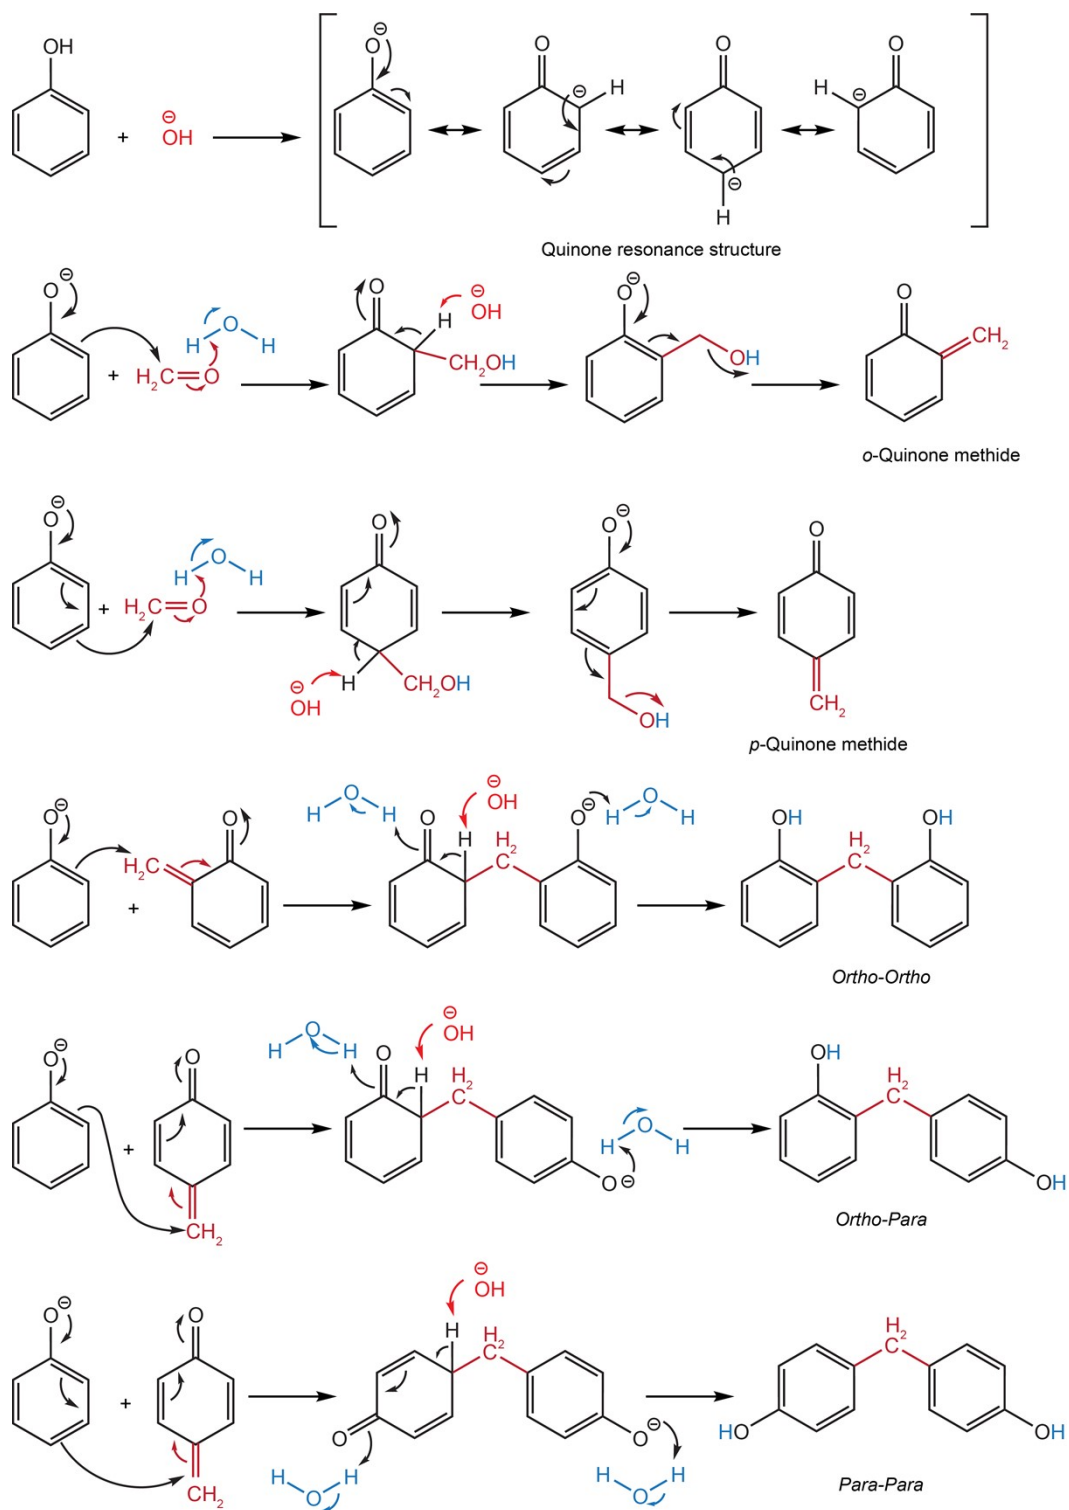

**Figure S4:** Mechanism of dimer formation through quinone methide intermediate.

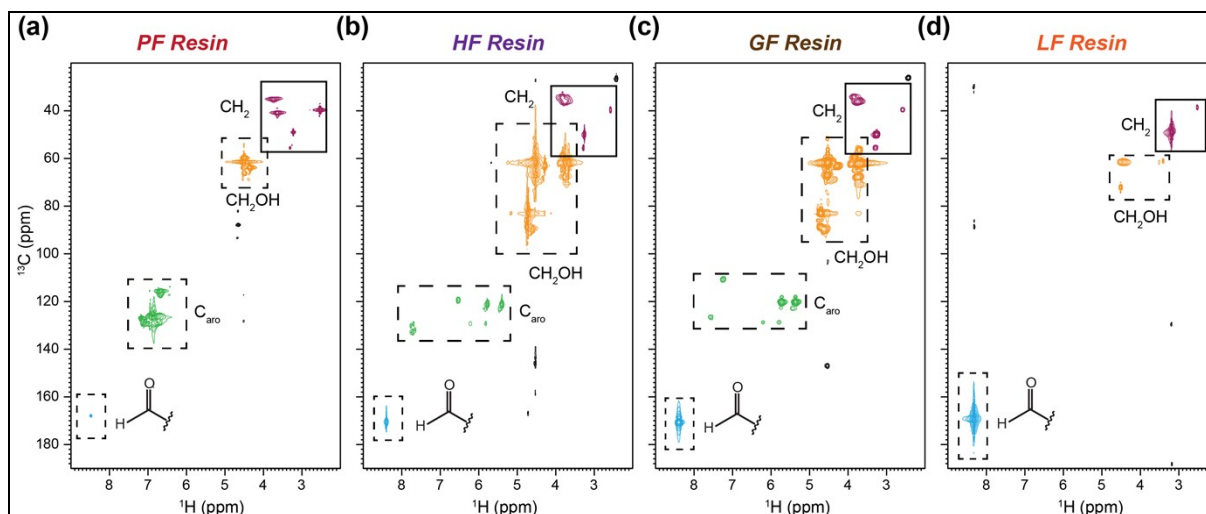

**Figure S5:** HSQC spectra of formaldehyde resins. (a) PF resin with  $C_{\text{aro}}$ ,  $\text{CH}_2\text{OH}$ , and  $\text{CH}_2$  peaks. (b) HF resin and (c) GF resin have similar peaks. (d) LF resin has two major peaks of formate ester and  $\text{CH}_3\text{OH}$ , along with  $\text{CH}_2\text{OH}$ .

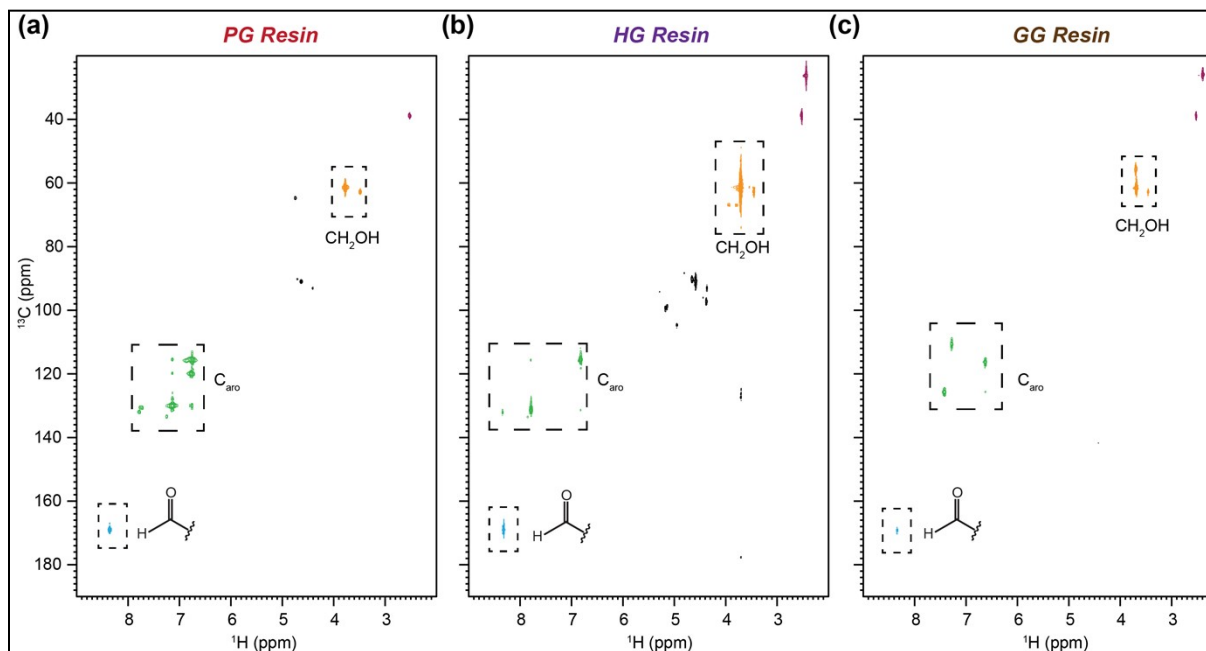

**Figure S6:** HSQC spectra of glyoxal resins. (a) PG resin with  $-\text{CHO}$ ,  $C_{\text{aro}}$ , and  $\text{CH}_2\text{OH}$  peaks, (b) HG resin, and (c) GG resin have similar peaks of  $-\text{CHO}$ ,  $C_{\text{aro}}$ , and  $\text{CH}_2\text{OH}$ .

**Table S1:**  $^{13}\text{C}$  Chemical shifts (in ppm) of precursor compounds. Not applicable (/).

| Compounds | C 1*  | C2    | C3    | C4    | C 5   | C6    | Carbonyl | Methyl (CH <sub>3</sub> ) | Methoxy (OCH <sub>3</sub> ) | Structure                                                                           |
|-----------|-------|-------|-------|-------|-------|-------|----------|---------------------------|-----------------------------|-------------------------------------------------------------------------------------|
| Phenol    | 157.3 | 115.2 | 129.4 | 118.8 | /     | /     | /        | /                         | /                           | 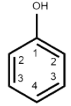 |
| H-monomer | 162.0 | 115.2 | 130.7 | 128.6 | /     | /     | 196.0    | 26.2                      | /                           |  |
| G-monomer | 151.7 | 147.5 | 111.1 | 128.9 | 123.4 | 114.9 | 196.0    | 26.2                      | 55.6                        |  |

\*Aromatic carbon attached to -OH group

**Table S2:**  $^{13}\text{C}$  Chemical shifts (in ppm) of cured resins acquired by 3.2 mm probe in 400 MHz solid-state NMR. Not applicable (/). Unidentified (-).

| Compounds         | $\text{C}_{\text{aro}}$               | $\text{CH}_2\text{OH}$ | Ether and -CHOH | $-\text{CH}_2^{\text{a}}$ | $-\text{CH}_2^{\text{b}}$ | Carbonyl#                       | Quinonoid | Methyl ( $\text{CH}_3$ ) | Methoxy ( $\text{OCH}_3$ ) | Unreacted formaldehyde | Structure                                                                             |
|-------------------|---------------------------------------|------------------------|-----------------|---------------------------|---------------------------|---------------------------------|-----------|--------------------------|----------------------------|------------------------|---------------------------------------------------------------------------------------|
| PF* resin (cured) | $\text{C}^{**}$ : 156.6; 117.7; 130.3 | 63.2                   | 70              | 34.7                      | 40.2                      | 173.1                           | 184.3     | /                        | /                          | -                      | 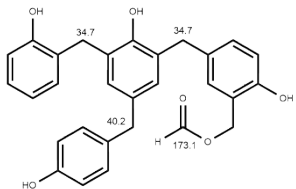   |
| HF* resin (cured) | 120.6; 129.0                          | 63.3                   | 70.3            | 34.3                      | /                         | 172.5; $\text{C}\alpha$ : 199.1 | -         | 26.2                     | /                          | -                      |   |
| GF* resin (cured) | 119.9; 125.9                          | 62.9                   | 70.1            | 34.5                      | /                         | 171.6, $\text{C}\alpha$ : 197.7 | -         | 26.2                     | 55.6                       | 89.5, 84.3             |  |
|                   |                                       |                        |                 |                           |                           |                                 |           |                          |                            |                        |  |

|                        |                                                     |      |      |               |       |       |       |      |      |      |  |
|------------------------|-----------------------------------------------------|------|------|---------------|-------|-------|-------|------|------|------|--|
| LF* resin<br>(cured)   | 128.7; 123.5;<br>111.4                              | 64.7 | 75.7 | 34.5          | 41.31 | 172.0 | -     | 23.7 | -    | 94.1 |  |
| PG*** resin<br>(cured) | C*: 165.5;<br>130.4; 116.1;<br>104.5; 102.7         | 61.9 | 73.2 | 37.5,<br>34.9 | -     | 172.9 | 181.2 | /    | /    | -    |  |
| HG*** resin<br>(cured) | 133.4; 131.1;<br>128.3; 116.4;<br>101.8             | 62.2 | 71.5 | 32.4,<br>30.8 | /     | 175.1 | 182.1 | 25.3 | /    | -    |  |
| GG*** resin<br>(cured) | C*: 149.8;<br>128; 123.3;<br>116.4; 112.1;<br>108.4 | 62.1 | 71.6 | 37.2          | /     | 175.6 | 182.2 | 25.6 | 54.1 | -    |  |

|                        |                            |      |      |      |      |       |       |   |      |   |  |
|------------------------|----------------------------|------|------|------|------|-------|-------|---|------|---|--|
| LG*** resin<br>(cured) | C*: 150.4;<br>119.8; 111.7 | 63.2 | 72.1 | 37.2 | 44.9 | 171.5 | 181.8 | - | 55.5 | - |  |
|------------------------|----------------------------|------|------|------|------|-------|-------|---|------|---|--|

\*PF (Phenol-Formaldehyde), HF (Lignin H Monomer-Formaldehyde), GF (Lignin G monomer-Formaldehyde), and LF (K-SW Lignin-Formaldehyde) resins were prepared under identical synthesis procedures.

\*\*Aromatic carbon attached to -OH group

\*\*\*PG (Phenol-Glyoxal), HG (Lignin H monomer-Glyoxal), GG (Lignin G monomer-Glyoxal), and LG (K-SW Lignin-Glyoxal) resins were prepared under identical synthesis procedures.

#Carbonyl groups are arising due to formate (HCOO-) formation and -COCH<sub>3</sub> group of H and G-lignin monomers which has <sup>13</sup>C chemical shifts of 172-176 ppm and 196-199 ppm, respectively.

<sup>a</sup> ortho-ortho, ortho-para methylene linkage.

<sup>b</sup> para-para methylene linkage.
